# Supplementary material
Source: publisher site journal article supplement (https://www.dovepress.com/article/587066)
Supplement: Supplementary file 1 [file 587066%20revised%20supplementary%20material.docx]

**SUPPLEMENTARY MATERIAL - SEARCH CRITERIA AND SYNTHESIS :**

For this narrative review, a systematic and multi-stage search strategy was developed to identify relevant literature. The search was conducted across three primary electronic databases: PubMed, Embase, and the Cochrane Library (Cochrane Database of Systematic Reviews).

The strategy was executed in two main phases: an initial broad search to capture foundational concepts and landmark studies, followed by a series of targeted searches focused on specific thematic areas of the review.

Phase 1: Broad Foundational Search

An initial comprehensive search was performed to identify all fundamental literature concerning fluid resuscitation, septic shock, and endothelial dysfunction. The search was conducted from database inception until October 2025 and was restricted to English-language publications. The primary search string, adapted for each database, combined MeSH terms (or equivalent, e.g., Emtree in Embase) with free-text keywords.

The general PubMed search equation was:

( "Shock, Septic"[Mesh] OR "Sepsis"[Mesh] OR "septic shock" OR "sepsis" ) AND ( "Fluid Therapy"[Mesh] OR "Resuscitation"[Mesh] OR "fluid resuscitation" OR "fluid management" OR "intravenous fluids" ) AND ( "Endothelium, Vascular"[Mesh] OR "Capillary Permeability"[Mesh] OR "Endothelial Glycocalyx"[Mesh] OR "endothelial dysfunction" OR "capillary leak" OR "vascular permeability" OR "endotheliopathy" ) (n = 4353).

Phase 2: Focused Thematic Searches

Drawing from the results of the initial search and the specific focus of this review, we identified key concepts that each represent a distinct area of investigation. For each of these concepts, a secondary, more focused search was conducted. This search primarily covered the period from January 2014 to October 2025. This timeframe was deliberately chosen to capture the most recent evidence following the publication of the landmark ProCESS, ARISE, and ProMISe trials, which marked a significant paradigm shift in sepsis management. This phase prioritized the retrieval of systematic reviews, meta-analyses, major randomized controlled trials, and international society guidelines to synthesize high-level evidence.

The key concepts were grouped into three domains, and each was combined with the terms "sepsis" or "septic shock":

1. Endothelial Pathophysiology and Biomarkers:

Keywords: Endothelial glycocalyx, glycocalyx shedding, syndecan-1, heparan sulfate, cytokine storm, inflammation, endothelial apoptosis, oxidative stress, reactive oxygen species, nitric oxide, iNOS, angiopoietin-2.

2.Pharmacology of Resuscitation Fluids and Major Clinical Trials:

Keywords: Crystalloids, colloids, balanced crystalloids, saline, hyperchloremia, albumin, hydroxyethyl starch, HES, SMART trial, ALBIOS trial, CRISTAL trial, 6S trial, BEST-Living trial, ALPS trial.

3.Clinical Management Strategies and Monitoring:

Keywords: Fluid responsiveness, dynamic assessment, passive leg raise, stroke volume variation, conservative fluid strategy, de-escalation, deresuscitation, point-of-care ultrasound, POCUS, capillary refill time, ANDROMEDA-SHOCK.

Finally, the reference lists of all retrieved cornerstone articles, reviews, and guidelines were manually screened to identify any additional relevant publications not captured by the electronic searches .
